# Supplementary material
Source: publisher figshare collection journal article supplement (https://gsapubs.figshare.com/ndownloader/files/22409424)
Supplement: Supplementary file 1 [file 22409424]

## Sheet: GOM CORES-DESCRIPTION PROGRESS
Damuth, J.E., and Olson, H.C., 2015, Latest Quaternary sedimentation processes in the northern Gulf of Mexico Intraslope Basin Province: Geosphere, v. 11, doi:10.1130/GES01090.1.
SUPPLEMENTAL TABLE. LIST OF PISTON CORES IN THE STUDY AREA
CRUISE	CORE	LATITUDE (N)	LONGITUDE (W)	DEPTH (M)	LENGTH (CM)	FIGURE NUMBER	DEBRIS FLOW	SLUMP	ST/SD	BRIEF DESCRIPTION
IG27	2	26.927	91.325	2314	1079					Dense gray homogeneous clay, dried and shrunken, vuggy
IG27	4	27.005	91.39	1760	625					Dark gray homogeneous clay with brownish clay top, dried out
IG36	1	27-51.1	91-29.2	284	481					Gray brown to gray mud; 364-482 cm may be clasts/blocks (?)
IG36	2	27-18.7	93-08.0	1206	906					Homogeneous gray brown mud
IG36	3	26-56.0	92-01.0	2022	686	11	X	X		0-50 cm undisturbed gray mud; 50 cm to base deformed mud clasts/blocks
IG36	4	27-00.8	92-08.5	1917	576		X			Grayish brown mud; 195-275 cm subtle deformation?
IG36	5	26-59.7	92-19.5	2014	764		X	X		0-75 cm gray brown; 75-312 cm disturbed gray mud with clasts
IG36	6	27-37.2	90-30.6	1115	1034		X		X	Gray mud; 325-390 cm numerous silt laminae
IG36	7	27-31.1	90-39.6	1265	964				X	Gray clay, some zones w/ scattered silt laminae; ash zones 690-713 cm?
IG36	8	27-26.4	90-42.9	1349	1044	SD1				0-49 cm gray brown clay; 49 cm to base homo dark gray clay (unifite?)
IG38	1	27-40.9	94-40.0	532	1100					Gray homogeneous clay, forams common to rare
IG38	2	27-40.2	94-35.7	369	1050					Gray homogeneous clay, forams common
IG38	3	27-40.8	94-36.2	344	910					Gray homogeneous clay, forams rare; foram sand in top 30 cm
IG38	4	27-40.9	94-36.5	354	1019					Gray homogeneous clay, forams rare to absent
IG38	5	27-42.0	94-35.9	309	484					Gray homogeneous clay, forams rare to absent
IG38	6	26-30.5	95-47.6	1286	182					Brownish gray hemipelagic clay, forams rare to common
IG38	7	26-46.3	95-36.7	1282	880					Browninsh gray hemipelagic clay, forams abundant
IG38	8	26-41.3	95-39.1	1425	387		X		X	Gray clay; 185-220 cm rippled fine sd beds; 230-360 cm fine sds w/ clasts
IG38	9	26-32.5	95-38.3	1420	442	6	X		X	Brown gray clay with very fine sand beds w/ mud clasts
IG38	10	26-42.7	95-26.0	1500	912				X	Gray brown hemipelagic clay, forams abdt; thin x-bedded sd beds; white ash layer 877-880 cm
IG38	11	26-36.4	95-20.1	1621	248				X	Brownish gray hemipelagic clay, forams common; rare thin x-bedded sd beds
IG38	12	26-58.4	94-18.0	1897	517	3			X	Gray hemipelagic mud; numerous lams and thin sd beds; mud clasts
IG38	13	26-58.7	94-18.3	1238	458					Grayish brown hemipelagic clay, forams abdt; ash layer 441-45 cm
IG38	14	26-53.1	94-18.9	1901	333					Gray hemipelagic clay, forams common
IG38	15	27-34.2	94-22.4	773	526	4	X		X	Gray brown clay with fine sand beds, x-beds and mud clasts
IG38	16	27-29.9	94-26.9	894	918	4	X	X	X	Gray brown clay with fine sd beds, ripples and clasts, deformation
IG38	17	27-19.5	94-20.7	1429	846		X	X	X	Gray brown clay with faults, clasts and a fine sand bed w/ x-beds
IG38	18	27-06.4	94-28.1	1724	960			X		Gray to bn gray hemipelagic clay, forams common; may be MTD below 400 cm
IG38	19	27-01.3	94-32.4	1333	1060				X	Grayish brown to bn gray clay; brick red mud; color banded below 500 cm + rare silt lams
IG38	20	26-59.8	93-51.9	1256	900					Grayish brown hemipelagic clay, forams abdt
IG38	21	27-12.2	93-47.4	1204	962					Grayish brown hemipelagic clay, forams abdt
IG38	22	27-13.9	93-46.8	1014	866					Grayish brown hemipelagic clay, forams abdt
IG38	23	27-11.4	93-47.2	1360	682	11	X			Grayish brown clay with many zones of deformation and mud clasts (MTD)
IG38	24	27-04.5	94-00.0	1187	950					Grayish brown hemipelagic clay, forams abdt; white ash layer 784-86 cm
IG38	25	27-16.9	93-21.2	1049	416					Brownish gray hemipelagic clay, forams abdt
IG38	26	27-17.5	93-19.5	1214	666	12		X		Deformed, faulted and folded clays of variegated colors (MTD)
IG38	27	27-18.2	93-08.0	1255	987		X	X		Grayish brown hemipelagic clay with some thin intervals of mud clasts and deformation
IG38	28	27-19.7	93-10.6	1015	1025					Grayish brown hemipelagic clay, forams common to abdt
IG41	1	27-40.7	94-35.6	322	711					Brownish gray to gray hemipelagic clay, forams sparse
IG41	2	27-41.0	94-35.7	297	505					Homo gray mud, low forams, except top 5 cm is high in foram sand; brick red clay 143-255 cm
IG41	3	27-41.2	94-35.0	306	501					Brownish gray to gray clay; some brick reddish clay zones
IG41	4	27-41.3	94-35.0	297	510					Homogeneous gray clay, forams rare; thin zone of mud clasts(?) 235-250 cm
IG41	5	27-41.4	94-35.6	280	331					0-20 cm residual foram sd; gray clay below; a couple of brick reddish clay zones
IG41	6	27-41.8	94-35.1	315	116					0-20 cm residual foram sd; gray homo clay below
IG41	7	27-41.9	94-35.5	324	446					Brownish gray to gray clay, forams common
IG41	8	27-41.5	94-34.9	314	268		X			0-5 cm residual foram sd; gray to bn and reddish bn clay; MTD structures below 130 cm
IG41	9	27-41.6	94-35.4	272	219				X	0-5 cm residual foram sd; gray to bnish gray clay; rare st/sd structures
IG41	10	27-41.5	94-34.8	306	306					0-15 cm residual foram sd; gray to brownish or reddish brown clay; MTD below 150 cm (?)
IG41	11	26-53.1	94-28.8	1261	688					0-630 cm gray to bnish gray hemipelagic clay, forams abdt; 630-660 cm may be MTD
IG41	12	26-52.6	94-17.8	2095	353	3			X	Gray clay with interbeds of silt and sand, some beds normally graded
IG41	13	26-57.4	94-08.7	1931	415					Gray clay with some interbeds of st/sd and some disturbed zones with mud clasts
IG41	14	27-06.7	93-30.3	908	504		X		X	Grayish brown to brownish gray hemipelagic clay, forams abdt; no ash
IG41	15	27-04.8	93-35.0	1435	905					Brownish gray to grayish brown hemipelagic clay, forams abdt; no ash
IG41	16	27-01.6	93-21.9	1435	876					Grayish brown to brownish gray hemipelagic clay, forams abdt; ash? ~850 cm
IG41	17	27-01.5	93-20.5	1513	913					Brownish gray to grayish brown hemipelagic clay, forams abdt; ash 776-80 cm
IG41	18	26-59.6	93-07.1	1606	899					Brownish gray to grayish brown hemipelagic clay, forams abdt; no ash
IG41	19	27-00.1	93-06.9	1574	450					Brownish gray to grayish brown hemipelagic clay, forams abdt; no ash
IG41	20	26-55.4	91-39.4	2131	330	3			X	Brownish gray hemipelagic clay with thin to medium sd beds
IG41	21	26-56.0	91-12.4	2144	940					Gray to bnish gray hemipelagic clay, forams common; some color banded zones
IG41	22	26-55.3	91-22.5	2341	647				X	Gray to color-banded clay lams; location Orca Basin
IG41	23	26-56.1	91-19.4	2324	900					Gray to color-banded clay lams; location Orca Basin
IG41	24	26-57.5	90-52.3	1952	620	12	X		X	Gray mud with sand beds and clasts
IG41	25	26-57.9	90-52.1	1933	397					Bnish gray hemipelagic clay, forams common
IG41	26	26-52.7	90-59.7	2176	827				X	Brownish gray homogeneous hemipelagic clay, forams common; colored mud lams
IG41	27	26-53.9	90-58.6	2159	823		X			Brownish gray homo clay with reworked clay to fine sd lams (graded beds); MTD below 640 cm
IG41	28	26-53.3	91-52.7	1922	825			X	X	Brownish gray hempelagic clay with MTD below 330 cm
IG41	29	26-58.8	92-24.3	1832	331		X			0-125 cm bnish hemipelagic clay, forams abdt; below 125 cm dense silty gray clay
IG41	30	27-16.4	92-57.7	1271	620		X			Gray hemipelagic clay with zones of MTD
IG45	1	27-37.0	92-46.3	842	163					Gray homogeneous clay
IG45	2	27-35.5	92-49.2	912	816					Gray homogeneous clay, forams common
IG45	3	27-43.4	92-39.9	661	838					Brownish gray homogeneous clay, forams rare to absent
IG45	4	27-48.7	92-43.0	493	799					Brownish gray homogeneous clay, forams rare to absent
IG45	5	27-40.7	92-30.0	734	120				X	Gray homogeneous clay, forams common
IG45	6	27-22.7	91-14.0	1706	770		X		X	Brownish gray clay, forams common; deformed and mud clasts below 440 cm
IG45	7	27-26.0	90-44.6	1352	690	SD1				Top 110 cm brownish gray clay, forams abdt; 110 cm to base homo gray clay ("unifite")
IG45	8	27-31.2	90-55.3	1284	1070		X			Gray homogeneous clay; zones of mud clasts and "unifite"
IG45	9	26-58.0	91-17.2	2288	910		X			Grayish brown clay with subtle color laminae
IG45	10	26-58.0	91-17.9	2275	990					Brownish gray to grayish brown color laminated clay; exotic brick red lams; MTD near base
IG45	11	26-56.7	91-17.7	2241	684					Grayish brown to brownish gray clay
IG45	12	26-53.5	91-20.6	2242	649					Grayish brown to brownish gray clay, rare thin sd lams; MTD near base
IG45	13	26-54.0	91-21.7	2404	929					Grayish brown color laminated mud at top; "unifite" like clay below 225 cm
IG45	14	26-44.3	92-40.6	1872	790		X			Grayish brown hemipelagic sedt at top; MTD with clasts and deformation below
IG45	15	26-50.7	92-46.8	1636	784					Grayish brown clay, forams common; white ash layer 569-72 cm
IG45	16	26-56.6	92-49.1	1386	744					Grayish brown hemipelagic clay, forams abdt
IG45	17	26-58.8	93-50.2	1659	866					Grayish brown hemipelagic clay, forams abdt
IG45	18	27-24.5	92-46.3	1258	730					Grayish brown hemipelagic clay, forams abdt
IG45	19	27-15.1	94-12.9	1631	340		X		X	Gray deformed clay with clasts, folds and sand clasts
IG45	20	27-16.0	94-09.9	1416	363	11	X			Mostly fine to med sd matrix with mud clasts; deformed mud
IG45	21	27-14.0	94-10.8	1683	819		X		X	Gray clay with rare fine x-bed sands; thin deformed sd beds 780-820 cm
IG45	22	27-13.5	94-17.0	981	846					Brownish gray hemipelagic clay, forams abdt
IG45	23	27-06.2	94-26.8	1767	743	10	X			Deformed mud with mud clasts of variegated colors
IG45	24	27-07.7	94-26.4	1763	768	10	X			Brownish gray hemipelagic clay at top; 485 cm to base is MTD, deformation, clasts
IG45	25	27-07.8	94-21.1	1318	295					Grayish brown hemipelagic clay, forams abdt
IG45	26	27-43.5	94-17.9	504	452					Gray hemipelagic clay, forams common; numerous silt lams near base
IG45	27	27-43.9	94-28.3	301	438				X	Gray homogeneous clay with zones of foram sandy mud at top and base
IG45	28	27-48.5	94-29.4	301	994					Gray homogeneous mud, forams rare to absent
IG46	1	27-40.7	92-29.2	726	575		X			Brownish gray clay, mud clasts at top, but only slight evidence of deformation below
IG46	2	27-53.6	92-16.7	266	1022					Grayish brown to gray clay, forams abdt to common
IG46	3	27-37.0	91-59.1	930	905				X	Gray to bnish gray hemipelagic clay, rare silt/fine sd lams
IG46	4	27-33.9	91-27.4	1078	715				X	Homogeneous gray to bn gray clay ("unifite"), but color contacts imply several flows
IG46	5	27-44.4	91-12.7	555	424				X	Dark gray clay, oil in top 150 cm; indurated carbonate pebble or clast intervals
IG46	6	27-32.3	90-39.9	1245	1140				X	Gray brown clay over gray homo clay "unifite"; intervals with st/sd lams; possible deform
IG46	7	27-10.3	90-37.2	1585	740				X	Grayish brown to gray clay; color banding; numerous silt/sd lams below 500 cm
IG46	8	27-01.5	90-24.5	2126	465	8			X	Gray clay with abundant color bands and layers + numerous silt/fine sd lams
IG46	9	26-54.8	91-20.8	2380	1136					Brownish gray clay, forams abdt, color lams and gas vugs
IG46	10	27-00.3	91-31.5	2195	339				X	Brownish gray to gray hemipelagic clay, forams abdt to common, rare silt lams
IG46	11	26-58.0	91-36.8	1810	306					Grayish brown hemipelagic clay, forams abdt
IG46	12	26-42.2	91-42.7	2050	361					Grayish brown hemipelagic clay, forams abdt
IG46	13	27-05.3	92-51.8	1253	330					Gray brown hemipelagic clay, rare silt lams
IG46	14	27-05.2	92-52.9	1405	760	11	X			Grayish brown to brownish gray clay with intervals of deformation and clasts
IG46	15	27-31.5	94-24.4	868	695	4			X	Brownish gray clay with numerous silt/fine sd lams below 300 cm
IG47-1	1	27-44.10	91-12.4	614	480				X	Gray hemipelagic clay, forams common; no color evidence of Holocene
IG47-1	2	27-44.05	91-16.32	541	577					Gray to brownish gray clay, forams rare; several silt lams from 276-560 cm
IG47-2	1	27-35.31	91-21.99	937	371					Gray to brownish gray clays, forams rare
IG47-2	2	27-44.21	91-18.6	568	390					Dark gray clay, forams rare; a few silt lams 350-390 cm
IG47-2	3	27-43.38	91-13.51	684	1012					Brownish gray to gray clay; 2 silt lams near base
IG47-2	4	27-44.56	91-13.32	553	1010					Dark gray clay, some indurated burrows? (siderite?); silt lams 580-590 cm
IG47-2	5	27-44.43	91-12.93	567	870					Gray clay, forams rare
IG47-2	6	27-44.06	91-13.7	562	756				X	Gray clay, forams rare; several thin st/sd laminae with mud draped ripples
IG47-2	7	27-44.02	91-12.27	554	905				X	Gray clay, forams rare, a few st/sd lams 300-530 cm
IG47-2	8	27-44.27	91-12.58	550	465					Dark gray homo clay, forams rare, slight burrows
IG47-2	9	27-44.21	91-13.43	567	245					Gas disturbed gray clay with numerous indurated fragments + oil strings
IG47-2	10	27-43.44	91-15.35	642	537					Dark gray gas-disrupted clay
IG47-2	11	27-44.09	91-18.33	574	454		X			Gray to brownish gray clay, forams common; possible zone of mud clasts 170-335 cm
IG47-2	12	27-43.98	91-18.10	563	370					Dark gray clay, highly gas disturbed w/ oil in cracks
IG47-2	13	27-43.60	91-21.44	688	513					Bnish gray to gray homo clay, slight burrows, forams rare to common
89G01	1	27.088	94.41	1760	284		X			Highly fractured bnish gray clay with exotic mud clasts of various colors
89G01	2	27.118	94.4072	1777	289				X	Highly fractured bnish gray clay, but no evidence of MTD
89G01	3	27.1313	94.4033	1765	422	10	X			MTD composed of mud clasts of various sizes and colors plus deformation and flow
89G01	4	27.1047	94.376	1730	396		X			MTD composed of large deformed gray clay clasts and blocks plus deformation
89G01	5	27.0822	94.3017	1096	437					Brownish gray to grayish brown highly fractured clay but no evidence of MTD
89G10	1	26.0583	94.5108	2905	460					Grayish brown hemipelagic clay, forams rare to common, moderate burrows, highly fractured
89G10	2	24.1202	95.2473	3632	397					Grayish brown hemipelagic clay, forams rare to common, moderate burrows
89G10	3	25.1733	95.0803	3543	470				X	Grayish brown to bnish gray hemipelagic clay, forams rare to common; 2 st/fine sd beds
89G10	4	25.2137	95.0617	3543	580		X			Grayish brown hemipelagic clay; below 350 cm disturbed beds and deformed sand beds or clasts
89G10	5	26.209	94.5317	2881	267					Grayish brown to bnish gray hemipelagic clay, forams rare to common
90G13	1	27.0183	95.2983	1249	1071					Gray bn to bn gray clay, well burrowed, forams abdt
90G13	2	27.0283	95.2567	1385	441				X	Grayish brown hemipelagic over deformed sediments and mud clasts + sandy laminae
90G13	3	27.0272	95.3283	1414	408		X			Gray hemipelagic clay over deformed sediments and mud clasts of variegated color
95G06	1	27-26.35	95-40.26	803	308	15	X	X		Brownish gray hemipelagic clay over deformed clay and mud clasts + sand clasts
95G06	2	27-22.13	95-34.95	1063	366	15	X		X	Brownish gray hemipelagic clay over deformed clay and mud clasts + sand clasts
95G06	3	27-27.0	95-37.48	791	186				X	Hemipelagic brownish gray clay and a couple silt/fine sand beds
95G06	4	27-29.12	95-34.4	738-48	366		X			Hemipelagic brownish gray clay over deformed, flowed gray clay
95G06	5	27-32.24	95-38.02	662	376					Hemipelagic brownish gray clay w/ no evidence of deformation
95G06	6	27-36.11	95-35.9	491	375					Hemipelagic brownish gray clay over gray clay
95G06	7	27-36.29	95-26.41	598	186					Hemipelagic gray, brownish gray and brick reddish brown clay
95G06	8	27-35.73	95-26.0	621	283		X			Hemipelagic gray, brownish gray and brick reddish brown clay; possible deformation 255-58 cm
95G06	9	27-36.43	95-25.1	654	312					Hemipelagic gray brown to brownish gray and brick reddish brown clay
95G06	10	27-26.21	95-41.71	765	472		X			Hemipelagic gray to gray brown clay over deformed clay and mud clasts; one sand bed
95G06	11	27-29.04	95-39.66	750-61	463		X		X	Gray and grayish brown clay over deformed clay and mud clasts and thin sand laminae and beds
95G06	12	27-31.5	95-37.68	679	283					Brownish gray hemipelagic clay
95G06	13	27-35.77	95-26.45	619-45	433					Brownish gray hemipelagic clay
95G06	14	27-32.78	95-21.76	819	430				X	Grayish brown to brick reddish brown hemipelagic clay; rare silt laminae
97G06	1	27-09	92-36.76	1210	450					Gray clay w/ good stratigraphy
97G06	2	27-8.01	92-39.71	1251	405				X	Gray clay w/ silt laminae 310-410 cm
97G06	3	27-7.90	92-40.01	1241	470	3			X	Gray clay with silt; thick sands below 300 cm
97G06	4	26-55.88	92-32.83	1720	448					Gray clay
97G06	5	26-49.94	92-28.35	1983	426					Gray clay w/ mud turbidite? below 350 cm
97G06	6	26-50.41	92-27.68	1972	438		X			Mud turbidite? over MTD with mud clasts
97G06	7	26-46.0	92-24.46	1770	412		X			Gray clay to 240 cm, MTD with mud clasts
97G06	8	26-46.02	92-28.26	1767	388					Gray clay w/ good stratigraphy
97G06	9	26-34.56	92-13.51	2410	470					Gray clay w/ some silty zones
97G06	10	26-33.58	92-13.93	2632	415				X	Gray clay; silt/sand graded beds below and sandy MTD at base
97G06	11	26-32.84	92-14.31	2607	344		X		X	Gray clay; silty lams and MTD below 120 cm
97G06	12	26-30.53	92-15.36	2530	346		X	X	X	Gray clay; graded silt/sand and MTD with mud clasts below 100 cm
97G06	13	26-33.01	92-10.27	2605	335		X	X		Gray clay; MTD below 80 cm
97G06	14	26-33.23	92-11.80	2640	420				X	Gray clay; some silt laminae 210-290 cm
97G06	15	26-27.45	92-25.39	2480	426		X	X	X	Gray clay; MTD with mud clasts below 120 cm
97G06	16	26-29.93	92-23.09	2320	452		X			Gray clay; graded silt/sand and MTD near base
97G06	17	26-28.33	92-19.84	2103	389		X			Gray clay; MTD with mud clasts below 295 cm
97G06	18	26-29.47	92-19.18	2000	412		X			Gray clay; MTD with mud clasts below 290 cm
97G06	19	26-35.79	92-18.27	1960	392		X			Gray clay; MTD with mud clasts below 270 cm
97G06	20	26-22.00	91-55.21	2040	411					Gray clay
97G06	21	26-22.01	91-59.18	2051	406					Gray clay w/ good stratigraphy
97G06	22	26-28.52	91-59.99	2060	394		X			Gray clay; MTD with mud clasts below 220 cm
97G06	23	26-28.53	92-02.39	2310	455		X			Gray clay; MTD with mud clasts below 160 cm
97G06	24	26-31.33	92-08.07	2120	408		X		X	Gray clay with MTD with mud clasts and silty MTD
97G06	25	26-30.40	92-06.11	2422	467		X		X	Gray clay with MTDs with clasts and silty zones throughout
97G06	26	26-20.95	92-17.22	2365	377		X			Gray clay; MTD with mud clasts below 100 cm
97G06	27	26-17.50	92-16.99	2442	410					Gray clay w/ good stratigraphy
97G06	28	26-27.70	92-30.23	2045	411		X			Gray clay; MTD below 150 cm
97G06	29	26-39.20	92-19.34	2380	424					Gray clay; silty below 350 cm
97G06	30	26-40.49	92-19.84	2395	379					Gray clay; good stratigraphy
97G06	31	26-55.89	92-02.68	2078	370		X			Gray clay; MTD below 75 cm
97G06	32	26-54.59	92-03.97	2112	340		X			Gray clay; MTD below 80 cm
97G06	33	26-57.38	92-02.98	2115	454				X	Gray clay, rare silt lams
97G06	34	26-52.68	92-05.63	1620	410		X		X	Gray clay; silt lams and MTD near base
97G06	35	27-06.67	92-28.31	1682	399		X		X	Gray clay; mud turbidite and MTD below
97G06	37	27-07.53	92-43.03	1382	450		X	X		Gray clay; MTD with mud clasts below
97G06	38	27-06.45	92-37.44	1310	380					Gray clay; possible MTD toward base
90 L566	1	27.3417	96.145	247	112					Homogeneous gray clay, forams rare
90 L566	2	26.8183	94.8175	1310	85					Brownish gray hemipelagic clay, well burrowed, forams rare-common
90 L566	3	26.8803	95.5833	1203	182					Brownish gray hemipelagic clay, well burrowed, forams rare-common
90 L566	4	27.175	95.0833	1290	90					Brownish gray hemipelagic clay, well burrowed, forams rare-common
90 L566	5	27.1958	95.0892	1275	230	SD3	X		X	Brownish gray hemipelagic clay, forams common, graded sand beds, mud clasts
90 L566	6	26.415	95.4183	1579	255				X	Brownish gray hemipelagic clay with several silt/sd laminae
90 L566	7	27.1238	94.4325	1755	266					Brownish gray hemipelagic clay, well burrowed
90 L566	8	27.2737	94.385	1456	261					Brownish gray hemipelagic clay, forams common, well burrowed
90 L566	9	27.1087	94.975	1384	291					Brownish gray hemipelagic clay, forams common, well burrowed
90 L566	10	27.09	95.137	1364	118					Brownish gray hemipelagic clay, forams common-abdt, well burrowed
90 L566	11	26.9642	95.3217	1420	244	15	X			Brownish gray hemipelagic clay to 130 cm; MTD with deformation and mud clasts below
90 L566	12	26.7797	95.1583	1602	172				X	Brownish gray hemipelagic clay; 2 cm fine-med sand at base
90 L566	13	26.7878	95.225	1593	156				X	Brownish gray hemipelagic clay, forams common-abdt, well burrowed
90 L566	14	27.1783	95.4183	1268	194		X		X	Brownish gray hemipelagic clay to 173 cm; MTD below
90 L566	15	27.2338	95.7495	955	305					Brownish gray hemipelagic clay, forams common to abdt, well burrowed
90 L566	16	27.2775	95.8408	691	270					Brownish gray hemipelagic clay, forams common to abdt, well burrowed
91 L575	1	27.1017	95.2533	1091	472				X	Brownish gray hemipelagic clay, forams common to abdt, well burrowed
91 L575	2A	27.0358	95.1398	1417	87					Brownish gray hemipelagic clay, forams common to abdt, well burrowed
91 L575	2B	27.0173	95.1423	1431	279	SD3			X	Brownish gray hemipelagic clay; fine to med sd beds below 220 cm
91 L575	3	27.1517	95.213	1286	294	SD3	X		X	Brownish gray hemipelagic clay, forams abdt; deformed med sd bed at base
91 L575	4	27.1117	95.2317	1111	365					Brownish gray hemipelagic clay, forams abdt
91 L575	5	27.1133	95.2775	1051	356					Brownish gray hemipelagic clay; forams abdt.
91 L575	6	27.0717	95.4942	1286	295	15	X		X	Brownish gray hemipelagic clay with graded sand beds below 225 cm w/ mud clasts
91 L575	7	27.1633	95.3717	1286	360	15			X	Brownish gray hemipelagic clay to 341 cm; fine to med sand below to base
91 L575	8	27.1583	95.3265	1286	304		X		X	Brownish gray hemipelagic clay to 242 cm; 242-250 cm fine sand; mud MTD to base
91 L575	9	27.1433	95.3247	1292	322	SD3	X		X	Brownish gray hemipelagic clay to 250 cm; 250-280 cm fine sd; muddy MTD to base
91 L575	10	27.1342	95.3183	1286	261		X		X	Brownish gray hemipelagic clay; 201-220 cm graded sd; 220 cm to base muddy MTD
91 L575	11	27.0833	95.167	1345	365					Brownish gray hemipelagic clay, forams common to abdt
91 L575	12	27.0833	95.1122	1386	213					Brownish gray hemipelagic clay, forams common to abdt, well burrowed
91 L575	13	27.1333	95.1417	1326	291				X	Brownish gray hemipelagic clay; med sand 222-224 cm
91 L575	14	27.1183	95.1643	1334	208				X	Brownish gray hemipelagic clay; rare sd lam below 175 cm
91 L580	1	27.3433	95.606	1020	51					Brownish gray hemipelagic clay, forams common, well burrowed
91 L580	2	27.325	95.545	1100	280	15	X		X	Brownish gray hemipelagic clay, sd w/ mud clasts
91 L580	3	27.3633	95.2655	1100	240	SD3	X		X	Brownish gray hemipelagic clay over thick sands; deformed red mud and sd
91 L580	4	26.848	95.2117	1590	360	SD3		X		Brownish gray hemipelagic clay to 174 cm; muddy MTD to base
91 L580	5	26.4175	95.154	1732	157				X	Brownish gray hemipelagic clay with a few med sd beds (28-33 cm; 83-84 cm)
91 L580	6	26.4253	95.1873	1747	234					Brownish gray hemipelagic clay, sand-filled burrows
91 L580	7	26.29	95.4382	1571	355			X		Brownish gray hemipelagic clay, but apparent subtle deformation may mean whole core MTD
91 L580	8	26.265	96.0733	843	289					Brownish gray hemipelagic clay, forams common to rare
91 L580	9	26.41	96.1857	649	318					Brownish gray hemipelagic clay, forams common to rare
94L 619	1	27-41.99	95-40.13	260	222					Homogeneous gray hemipelagic clay
94L 619	2	27-27.66	95-32.94	764	82			X		Gray clay over deformed clays of variegated colors, possible folds
94L 619	3	27-30.80	95-18.89	917	234					Hemipelagic brownish gray clay
94L 619	4	27-37.36	95-29.58	528	259					Hemipelagic brownish gray clay
94L 619	5	27-41.93	95-40.55	258	262					Hemipelagic brownish gray clay
94L 619	6	27-38.31	95-40.53	436	219					Hemipelagic brownish gray clay
FM31	1	26.9472	94.234	1487	362				X	Bnish gray clay with forams common; a few sand blebs and disc. laminae below 230 cm
FM31	2	26.8458	94.069	1290	427				X	Grayish brown clay, forams abdt, well burrrowed
FM31	3	26.9583	94.2292	1500	428					Grayish brown clay, forams abdt, well burrowed; thin 5-cm mud clast zones?
RC9	18	25.283	91.367	3374	1005				X	Undisturbed clay w/ silt laminations
RC9	20	25.85	95.8	902	868					Gray clay
RC9	21	25.933	95.95	960	722					Gray Clay
RC9	22	26.317	94.35	1955	893					Well-burrowed clay; coring disturbance
RC9	23	26.017	92.633	2111	436			X		Clay; some dipping horizons; slump below 200 cm
RC9	24	25.683	90.733	3424	1024				X	Undisturbed clay with silt laminae
RC12	7	27.15	91.55	1942	488				X	Undisturbed clay with a 40 cm sand bed
RC12	8	25.2	93.017	3576	1036	8			X	Clay with numerous silt laminae
RC12	9	25.783	94.233	3263	1048					Undisturbed foram marl to clay, well burrowed
V3	48	27.417	90.467	1261	490					Clay
V3	49	25.25	90.5	3550	845				X	Gray clay with some thin x-stratified st/sd laminations; brown Holocene
V3	56	25.633	91.183	3356	950					Homogeneous well-burrowed clay
V3	57	25.783	91.517	3202	612				X	Homogeneous clay with rare silt laminations; x-beds and subtle color bands
V3	58	27.417	92.65	1234	509	9		X		Gray clay; folds and discordant beds (slump)
V3	59	27.683	92.767	712	924			X		Clay; possible discordant zones, e.g. dipping beds below 650 cm
V3	63	27.917	94	84	490				X	Sandy clay; disturbed clasts may be from core disturbance or flow-in
V3	64	27.75	94.1	327	254					Clay
V3	66	27.95	94.2	95	67				X	Clay and sand
V3	67	27.25	94.167	1591	490		X			Disturbed zones with clasts; subtle discordant zones
V3	68	25.05	94.633	3630	55					Homogenous gray brown clay
V3	92	27.333	96.017	455	649					Homogeneous clay
V3	93	27.2	95.717	964	855					Clay
V3	94	26.967	94.283	1984	122			X		Beautiful folds (slumps)
V3	95	26.817	94.133	1256	880					Clay and bn Holocene; laminated near base, may be disturbed below 720 cm w/ slight dip
V3	96	26.883	92.5	1789	590			X		Bn Holocene; some dipping beds (disturbed?)
V3	97	26.967	91.4	1961	840					Variable dips (disturbed)
V3	99	26.217	90.067	3157	802	8			X	Clay with numerous silt/sand laminations
V3	103	26.95	91.767	1771	785			X		Contorted, discordant beds from 260-450 cm; appears undisturbed below
V3	104	26.783	91.683	2074	825		X	X		Clay w/ some zones of clasts + discordant beds
V3	105	25.867	91.983	2791	400			X		Clay + silt laminations, dipping, disturbed (possible slump)
V3	112	27.867	95.367	91	735					Clay, possible disturbed zones; shell at 208 cm
V3	113	27.333	94.65	1118	1102					Homogeneous clay; volcanic ash bed
V3	114	27.467	92.75	761	1047					Homogeneous clay with burrows and subtle color bands
V3	115	27.3	92.133	1236	1035					Homogeneous to laminated clay, color bands
V3	116	27.233	92	1341	825					Homogeneous to laminated clay, color bands
V3	117	27.1	91.617	1682	1012					Homogeneous clay, color bands
V3	118	26.55	91.683	2212						Homogeneous clay, well burrowed; bn Holocene
V3	119	26.567	92.083	2076	440					Homogeneous clay, well burrowed; bn Holocene
V3	120	26.567	92.25	2575	662		X	X	X	Zones with mud clasts
V3	121	26.433	95.267	1648	935				X	Homogeneous clay, well burrowed
V3	122	26.083	95.533	1681	490				X	Homogeneous to laminated clay with color bands
V3	123	25.8	95.4	2562	857				X	Homogeneous to laminated clay; wood fragments
V3	124	25.383	93.367	3508	950					Clay with rare silt laminations; 460-66 cm and 562-68 cm disturbed, contorted(?); silt 820-21 cm
V17	12	25.833	92.483	2670	282					Clay with numerous silt laminations
V17	13	26.5	94.617	1910	360					Homogeneous clay, well burrowed
V17	14	27.6	94.183	756	535			X		Zones of folds and discordant beds below 50 cm
V26	137	25.85	92.2	2853	342			X	X	Clay with discordant beds; some core disturbance (stretching)
V26	138	25.533	92.55	1677	826					Clay with some silt laminations
V26	139	25.867	92.283	2492	657					Homogeneous to laminated clay, color bands, burrowed
